# Supplementary material for: TMT-based quantitative proteomic analysis revealed that FBLN2 and NPR3 are involved in the early osteogenic differentiation of mesenchymal stem cells (MSCs)
Source: publisher site journal article supplement (doi:10.18632/aging.204931), 2023-08-04
Supplement: Supplementary file [file aging-v15i15-204931-supplementary-material-SD1.pdf]

## SUPPLEMENTARY FIGURES

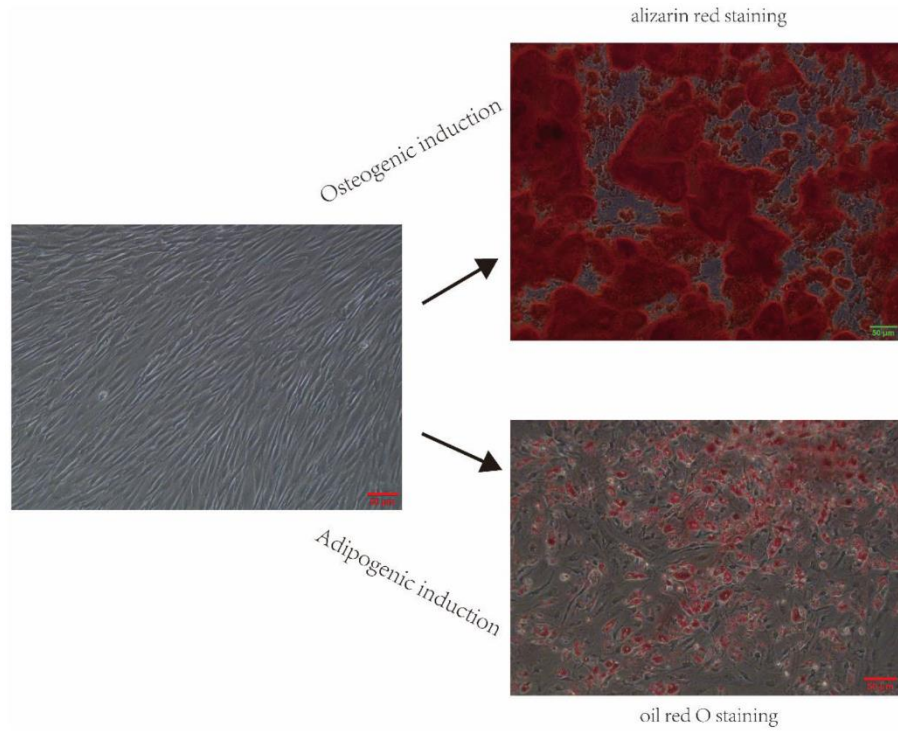

**Supplementary Figure 1. Following a 14-day stimulation with osteogenesis/adipogenesis media, the 6th generations MSCs underwent ARS and ORO staining.**

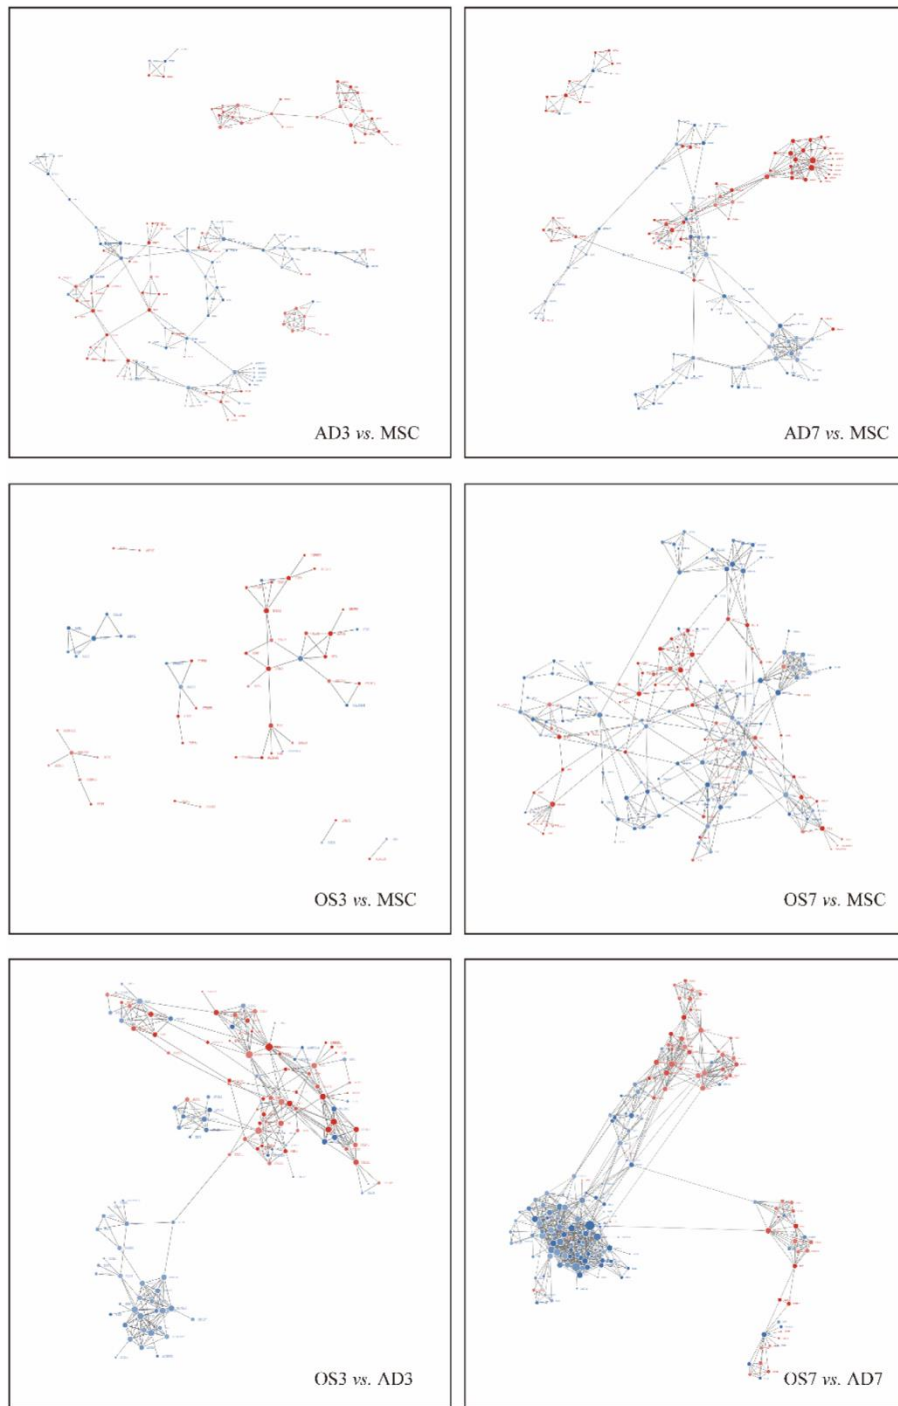

**Supplementary Figure 2. Interaction network of differentially expressed proteins.** The circle in the figure represents the differential expression of proteins, and different colors represent the differential expression of proteins (blue is down-regulated protein, red is up-regulated protein). The size of the circle represents the number of differential proteins and their interacting proteins.
